# Supplementary material for: Association of Impaired Fasting Glucose and Diabetes with SARS-CoV-2 Spike Antibody Titers after the BNT162b2 Vaccine among Health Care Workers in a Tertiary Hospital in Japan
Source: MDPI journal article supplement (doi:10.3390/vaccines10050776), 2022-05-13
Supplement: s1 [file s1]

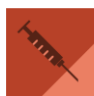

**Table S1.** Multivariable adjusted estimated geometric means (GMT) (95% CI) and ratio of mean (95% CI) of SARS-Cov-2 spike antibody titers according to the glycemic status defined as WHO criteria \*.

|                  | SARS-CoV-2 Spike IgG Antibodies |                         |
|------------------|---------------------------------|-------------------------|
|                  | GMT (95% CI)                    | Ratio of Mean (95% CI)  |
| Normoglycemia    | 5481 (5254–5718)                | 1.00 (Reference)        |
| IFG              | 3912 (2244–6819)                | 0.71 (0.41–1.25)        |
| Diabetes         | 3418 (2395–4876)                | <b>0.62 (0.43–0.89)</b> |
| <i>p</i> § trend |                                 | <b>&lt;0.001</b>        |

IFG, impaired fasting glucose; WHO, World Health Organization; FPG, fasting plasma glucose; CI, confidence interval. Values in bold show statistical significance. Model was adjusted for age (year, continuous), sex, BMI (kg/m<sup>2</sup>, continuous), cigarette smoking (yes or no), alcohol drinking (non-drinker, occasional drinker, <1 go/day, or ≥1 go/day), hypertension (yes or no), and days after the second vaccination (days, continuous). \* Normoglycemia was defined as <110 mg/dl, IFG was defined as FPG 110–125 mg/dl, and diabetes was defined as FPG ≥126 mg/dl or being under medical care for diabetes.

§ Based on linear regression analysis, assigning ordinal numbers to the normoglycemia, IFG, and diabetes status.
